# Supplementary material
Source: MDPI journal article supplement (https://www.mdpi.com/2227-7102/13/6/579)
Supplement: s1 [file s1 › education-2416513-supplementary.pdf]

---

## Supplementary Materials

**Table S1: Biomedical Science majors at California State University, Northridge (CSUN) that qualify for BUILD PODER participation**

| CSUN Colleges                  | BUILD Eligible Majors                                                                                                                                                                                                                                           |
|--------------------------------|-----------------------------------------------------------------------------------------------------------------------------------------------------------------------------------------------------------------------------------------------------------------|
| Engineering & Computer Science | Computer Science<br>Electrical & Computer Engineering<br>Mechanical Engineering                                                                                                                                                                                 |
| Health & Human Development     | Child and Adolescent Development<br>Communication Disorders and Sciences: Speech & Hearing Sciences<br>Environmental and Occupational Health<br>Family and Consumer Sciences: Dietetics & Food<br>Health Sciences<br>Kinesiology<br>Nursing<br>Physical Therapy |
| Science & Mathematics          | Biology<br>Chemistry & Biochemistry<br>Geological Sciences<br>Physics & Astronomy<br>Mathematics                                                                                                                                                                |
| Social & Behavioral Sciences   | Anthropology<br>Geography and Environmental Studies<br>Psychology<br>Sociology                                                                                                                                                                                  |

## Study Measures

**Table S2: Survey Items, Construct, Scale, and Reliability Indices**

| Item                                                                                            | Construct                    | Scale                | SAFS19                                              | CSS20                                               |
|-------------------------------------------------------------------------------------------------|------------------------------|----------------------|-----------------------------------------------------|-----------------------------------------------------|
|                                                                                                 |                              |                      | Reliability                                         | Reliability                                         |
|                                                                                                 |                              |                      | Cronbach's $\alpha$ /<br>Separation/<br>Reliability | Cronbach's $\alpha$ /<br>Separation/<br>Reliability |
| 1. I have strong sense of belonging to the community of scientists                              | <b>Science Identity</b>      | 5-point scale        | 0.87/                                               | 0.92/                                               |
| 2. I derive great personal satisfaction from working on a team that is doing important research |                              |                      | 2.57/                                               | 2.68/                                               |
| 3. I have come to think of myself as a scientist                                                |                              |                      | 0.87                                                | 0.88                                                |
| 4. I feel like I belong in the field of science                                                 |                              |                      |                                                     |                                                     |
| 1. Use technical science skills (use of tools, instruments, and/or techniques)                  | <b>Science Self Efficacy</b> | 5-point scale        | 0.93/                                               | 0.96/                                               |
| 2. Generate a research question                                                                 |                              |                      | 3.02/                                               | 3.48/                                               |
| 3. Determine how to collect appropriate data                                                    |                              |                      | 0.9                                                 | 0.92                                                |
| 4. Explain the results of a study                                                               |                              |                      |                                                     |                                                     |
| 5. Use scientific literature to guide research                                                  |                              |                      |                                                     |                                                     |
| 6. Integrate results from multiple studies                                                      |                              |                      |                                                     |                                                     |
| 1. Academic ability                                                                             | <b>Academic Self-concept</b> | 5-point Likert scale | 0.75/                                               | 0.53/                                               |
| 2. Drive to achieve                                                                             |                              |                      | 1.84/                                               | 1.38/                                               |
| 3. Mathematical ability                                                                         |                              |                      | 0.77                                                | 0.66                                                |
| 4. Self-confidence (intellectual)                                                               |                              |                      |                                                     |                                                     |

**Table S3: Factor Loadings for Science Identity, Science Self-Efficacy, and Academic Self-Concept**

| Item | SAFS19           |                       |                       | CSS20            |                       |                       |
|------|------------------|-----------------------|-----------------------|------------------|-----------------------|-----------------------|
|      | Science identity | Science self-efficacy | Academic self-concept | Science identity | Science self-efficacy | Academic self-concept |
| 1    | 0.79             | 0.64                  | 0.80                  | 0.86             | 0.78                  | 0.69                  |
| 2    | 0.51             | 0.79                  | 0.65                  | 0.76             | 0.88                  | 0.68                  |
| 3    | 0.86             | 0.84                  | 0.56                  | 0.93             | 0.94                  | 0.33                  |
| 4    | 0.80             | 0.87                  | 0.62                  | 0.88             | 0.89                  | 0.63                  |
| 5    |                  | 0.86                  |                       |                  | 0.89                  |                       |
| 6    |                  | 0.85                  |                       |                  | 0.85                  |                       |

*Note.* Factor loadings are all > .30

**Figure S1: Science Identity Trajectories across time between BUILD and non-BUILD students**

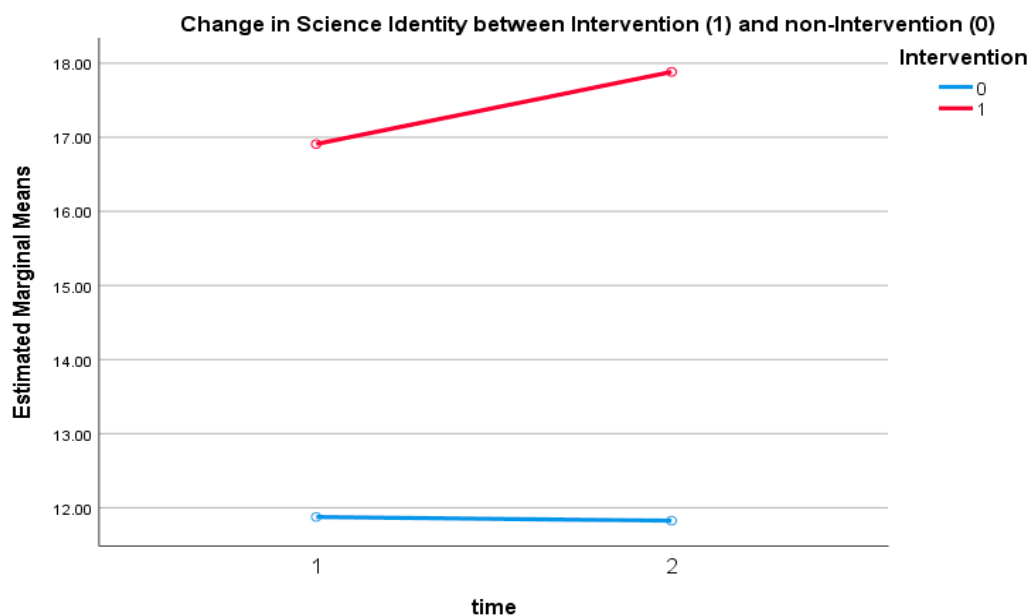

Figure S2: Science Self-efficacy Trajectories across time between BUILD and non-BUILD students

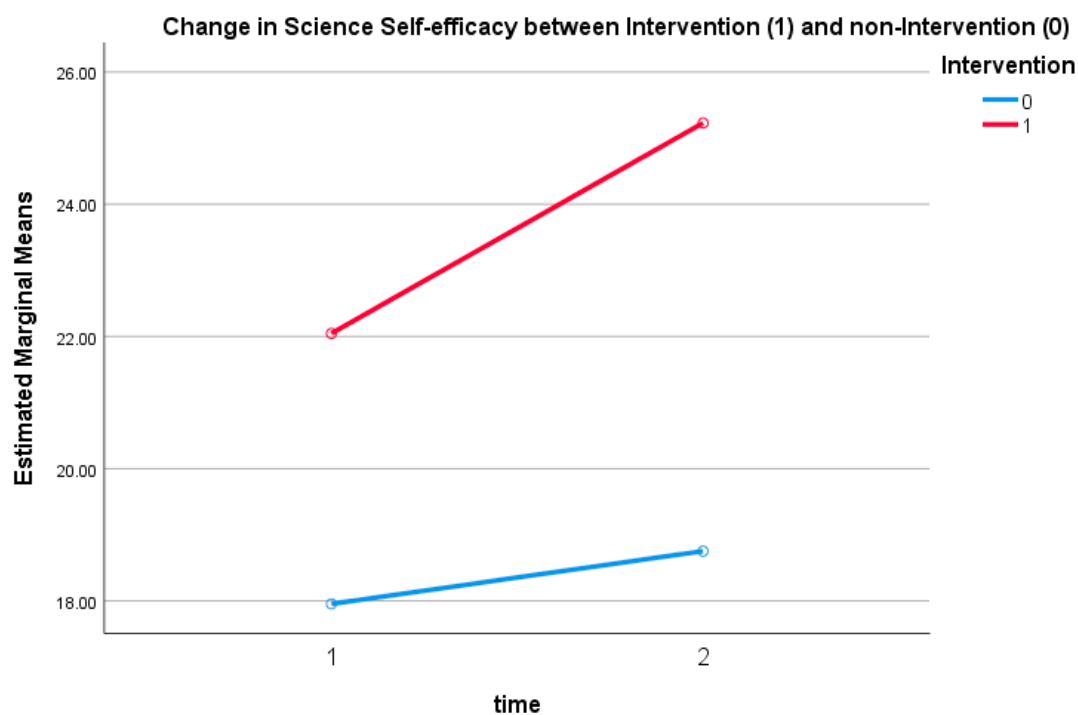

Figure S3: Academic Self-concept Trajectories across time between BUILD and non-BUILD students

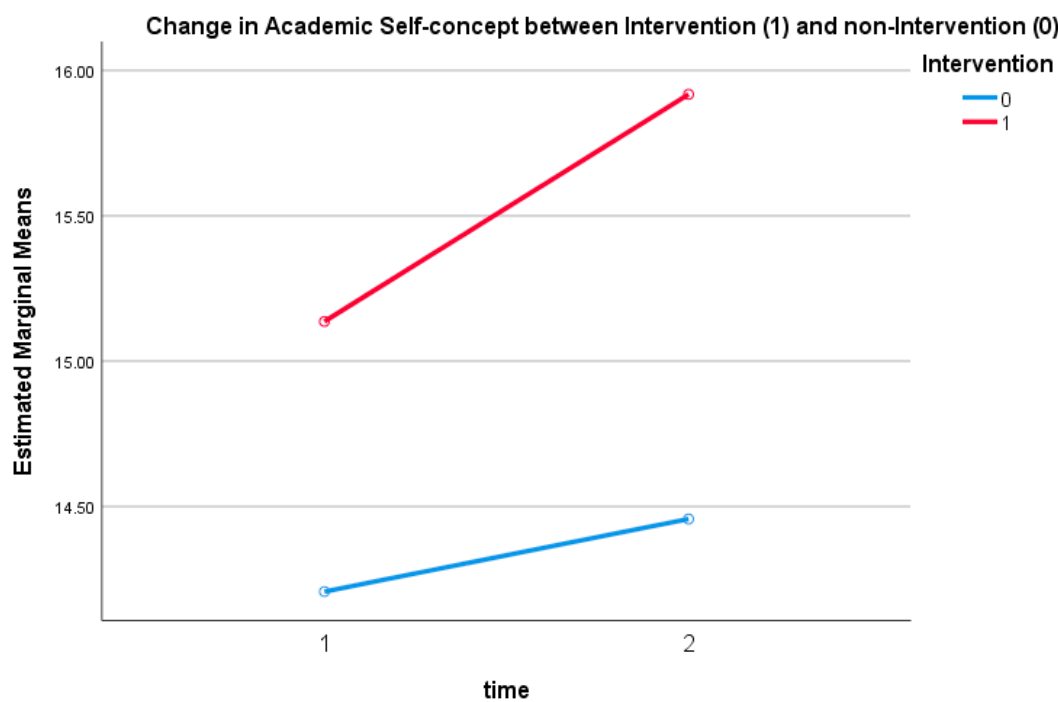

Table S4: Correlation Matrix for Sense of Belonging

| Item                     | BUILD  |       |        |       | Non-BUILD |         |         |       |
|--------------------------|--------|-------|--------|-------|-----------|---------|---------|-------|
|                          | 1      | 2     | 3      | 4     | 1         | 2       | 3       | 4     |
| 1. Sense of belonging    | -      |       |        |       | -         |         |         |       |
| 2. Science Identity      | 0.43** | -     |        |       | 0.15      | -       |         |       |
| 3. Science Self-efficacy | 0.35*  | 0.34* | -      |       | 0.48      | 0.62*** | -       |       |
| 4. Academic Self-concept | 0.33   | 0.23  | 0.47** | -     | 0.26**    | 0.30**  | 0.35*** | -     |
| <i>M</i>                 | 9.68   | 17.40 | 23.64  | 15.53 | 9.04      | 11.85   | 18.35   | 14.33 |
| <i>SE</i>                | 0.44   | 0.77  | 1.00   | 0.45  | 0.21      | 0.34    | 0.45    | 0.20  |

Note. \*\*\* $p < .001$ . \*\* $p < .01$ . \* $p < .05$ .
